# Supplementary material for: Compounding Parenteral Products in Pediatric Wards—Effect of Environment and Aseptic Technique on Product Sterility
Source: Healthcare (Basel). 2021 Aug 10;9(8):1025. doi: 10.3390/healthcare9081025 (PMC8393854; doi:10.3390/healthcare9081025)
Supplement: Supplementary file 1 [file healthcare-09-01025-s001.zip › healthcare-1287953-supplementary.pdf]

## Supplementary materials

# Compounding parenteral products at pediatric wards – effect of environment and aseptic technique on product sterility

Sonja Virtanen <sup>1</sup>, Karmen Kapp <sup>2</sup>, Maria Rautamo <sup>3</sup>, Lotta Schepel <sup>3</sup>, Carita Lindén-Lahti <sup>3</sup>, Cristina D. Cruz <sup>2</sup> and Päivi Tammela <sup>2,\*</sup>

<sup>1</sup> Division of Pharmaceutical Biosciences, Faculty of Pharmacy, P.O.Box 56 (Viikinkaari 5E), FI-00014 University of Helsinki, Finland; sonja.a.virtanen@outlook.com

<sup>2</sup> Drug Research Program, Division of Pharmaceutical Biosciences, Faculty of Pharmacy, P.O.Box 56 (Viikinkaari 5E), FI-00014 University of Helsinki, Finland; karmen.kapp@helsinki.fi (K.K); cristina.duran-tecruz@helsinki.fi (C.D.C.); paivi.tammela@helsinki.fi (P.T.)

<sup>3</sup> HUS Pharmacy, HUS Helsinki University of Hospital and University of Helsinki, Stenbäckinkatu 9B, 00290 Helsinki, Finland; maria.rautamo@hus.fi (M.R.); lotta.schepel@hus.fi (L.S.); carita.linden-lahti@hus.fi (C.L.-L.)

\* Correspondence: paivi.tammela@helsinki.fi; Tel.: +358-50-4480886

### Document S1: Instruction for compounding given to participants.

#### Instruction for sample compounding

Compounding should be done in the same way as normally during the workday. Additionally, settle plates will be opened on the table or in the biological safety cabinet before starting the compounding. After compounding, the participant will give finger dab plates to the agar plate.

1. Open the settle plates on the table or in the biological safety cabinet.
2. Start compounding.
3. Add 5 mL of sterile water for the injections through mini-spike to the injection bottle.
4. Let the powder dissolve.
5. Take 2 mL of solution through mini-spike to two syringes (10 mL).
6. Dilute the solution by adding sterile NaCl solution (0.9%) to the syringes (ad 10 mL) with another syringe and needle.
7. Close the solution syringe with a sterile cap.
8. Give finger dab plates.

### Document S2: Observation forms.

| Compounding in patient room:                                               | Participant |   |
|----------------------------------------------------------------------------|-------------|---|
|                                                                            | 1           | 2 |
| Participant does not have infectious disease                               |             |   |
| Participant is not wearing jewellery or watches on his/her hands or wrists |             |   |
| Participant cleans the table with an alkaline cleanser                     |             |   |
| Participant cleans the table with 80% denaturated ethanol                  |             |   |
| Participant washes hands with soap before compounding                      |             |   |
| Participant disinfects hands before compounding                            |             |   |
| Participant uses a disposable non-sterile protective gown                  |             |   |
| Participant uses a hair cover                                              |             |   |
| Participant puts on a surgical face mask                                   |             |   |

Participant puts on non-sterile gloves before disinfecting the equipment to be used in the compounding and cleaning the compounding area

Participant disinfects his/her hands before changing the gloves

Participant changes the gloves before starting the medicine compounding

Participant disinfects the septum of the vial even though it has manufacturer's cap on

Participant does not touch the connecting part of the syringe or the needle

Participant disinfects the septum of the vial before piercing it again

Participant mixes the product by turning back and forth, not shaking

| Compounding in medicine room:                                                                                                            | Participant<br>1 | Participant<br>2 |
|------------------------------------------------------------------------------------------------------------------------------------------|------------------|------------------|
| Participant does not have infectious disease                                                                                             |                  |                  |
| Participant is not wearing jewellery or watches on his/her hands or wrists                                                               |                  |                  |
| Participant cleans the table with an alkaline cleanser                                                                                   |                  |                  |
| Participant cleans the table with 80% denaturized ethanol                                                                                |                  |                  |
| Participant washes hands with soap before compounding                                                                                    |                  |                  |
| Participant disinfects hands before compounding                                                                                          |                  |                  |
| Participant uses a disposable non-sterile protective gown                                                                                |                  |                  |
| Participant uses a hair cover                                                                                                            |                  |                  |
| Participant puts on a surgical face mask                                                                                                 |                  |                  |
| Participant puts on non-sterile gloves before disinfecting the equipment to be used in the compounding and cleaning the compounding area |                  |                  |
| Participant disinfects his/her hands before changing the gloves                                                                          |                  |                  |
| Participant changes the gloves before starting the medicine compounding                                                                  |                  |                  |
| Participant disinfects the septum of the vial even though it has manufacturer's cap on                                                   |                  |                  |
| Participant does not touch the connecting part of the syringe or the needle                                                              |                  |                  |
| Participant disinfects the septum of the vial before piercing it again                                                                   |                  |                  |
| Participant mixes the product by turning back and forth, not shaking                                                                     |                  |                  |

| Compounding in laminar biological safety cabinet:                                                                                        | Participant<br>1 | Participant<br>2 |
|------------------------------------------------------------------------------------------------------------------------------------------|------------------|------------------|
| Participant does not have infectious disease                                                                                             |                  |                  |
| Participant is not wearing jewellery or watches on his/her hands or wrists                                                               |                  |                  |
| Participant cleans the table with an alkaline cleanser                                                                                   |                  |                  |
| Participant cleans the table with 80% denaturized ethanol                                                                                |                  |                  |
| The BSC is turned on for 15 minutes before starting the compounding                                                                      |                  |                  |
| Airflow of the BSC is at maximum speed                                                                                                   |                  |                  |
| Participant washes hands with soap before compounding                                                                                    |                  |                  |
| Participant disinfects hands before compounding                                                                                          |                  |                  |
| Participant uses a disposable non-sterile protective gown                                                                                |                  |                  |
| Participant uses a hair cover                                                                                                            |                  |                  |
| Participant puts on a surgical face mask                                                                                                 |                  |                  |
| Participant puts on non-sterile gloves before disinfecting the equipment to be used in the compounding and cleaning the compounding area |                  |                  |
| Participant cleans the cabinet with an alcoholic disinfectant                                                                            |                  |                  |
| Participant places a sterile drape cover onto the benchtop in the BSC                                                                    |                  |                  |
| Participant disinfects the equipment to be used in the compounding before the compounding or putting them into the BSC                   |                  |                  |
| Participant disinfects his/her hands before changing the gloves                                                                          |                  |                  |

---

Participant changes the gloves before starting the medicine compounding

---

Participant disinfects the septum of the vial even though it has manufacturer's cap on

---

Front glass of the BSC is kept in working position

---

Participant opens sterile packages inside the BSC

---

Participant does not touch the connecting part of the syringe or the needle

---

Participant disinfects the septum of the vial before piercing it again

---

Participant mixes the product by turning back and forth, not shaking

---

No spatters

---

**Table S3.** Microbes identified by OmniLog ID System in the two contaminated product samples.

| Compounding area | Phenotype of the CFU                                   | Number of CFU/ml   | Identified contaminant            | Omnilog ID System protocol used |
|------------------|--------------------------------------------------------|--------------------|-----------------------------------|---------------------------------|
| PR               | Bright orange, big, round convex, shiny                | $1.89 \times 10^6$ | <i>Dietzia maris</i>              | Protocol A                      |
| PR               | Bright yellow, small, round, convex, shiny             | $0.38 \times 10^6$ | <i>Corynebacterium mycetoides</i> | Protocol A                      |
| BSC              | Light yellow, big, round, flat, shiny                  | $1.8 \times 10^4$  | <i>Paenibacillus castanea</i>     | Protocol B                      |
| BSC              | Light yellow (almost white), small, round, flat, shiny | $0.21 \times 10^6$ | <i>Staphylococcus capitis</i>     | Protocols A and C1              |
